# Supplementary material
Source: publisher figshare collection journal article supplement (https://acs.figshare.com/ndownloader/files/12463160)
Supplement: Supplementary file 1 [file 12463160]

## Supporting Information

### **A robust succinonitrile-based gel polymer electrolyte for lithium ion batteries withstanding mechanical folding and high temperature**

Pengfei Lv<sup>a,b</sup>, Yongsheng Li<sup>b</sup>, Yuhao Wu<sup>b</sup>, Guobiao Liu<sup>b</sup>, Hao Liu<sup>b</sup>, Shaomin Li<sup>b</sup>, Changyu Tang<sup>b,\*</sup>, Jun Mei<sup>b</sup>, Yuntao Li<sup>a\*</sup>

a.College of Material Science and Engineering, Southwest Petroleum University, Chengdu 610500, China

b. Chengdu Green Energy and Green Manufacturing Technology R&D Center, China Academy of Engineering Physics, Chengdu 610200, China

E-mail:

Changyu Tang: sugarchangyu@163.com

Yuntao Li: yuntaoli@swpu.edu.cn

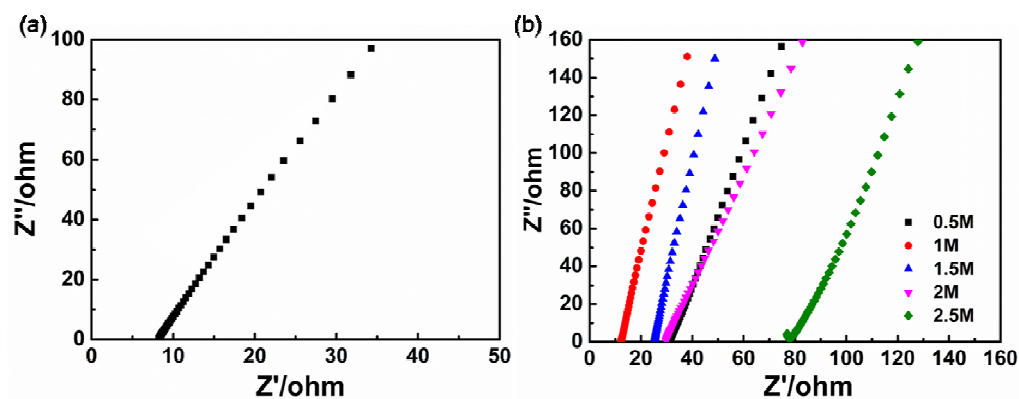

Figure S1. AC impedance spectra of GPE-LE (a) and GPE-SN-IM (b) films with different lithium salt concentrations at 25 °C.

In AC impedance spectra (Figure S1), the intercept between the straight line and the horizontal axis is the bulk impedance ( $R_b$ ). The ionic conductivity ( $\sigma$ ) can be calculated by the equation:  $\sigma = \frac{d}{R_b S}$ . Where  $d$  and  $S$  are the thickness and the effective area of polymer electrolyte, respectively, and  $R_b$  is the bulk impedance of electrolyte.

$$\text{GPE-LE: } \sigma = \frac{d}{R_b S} = \frac{0.029}{8.2 \times 1.8} = 1.92 \times 10^{-3} \text{ S} \cdot \text{cm}^{-1}.$$

$$\text{GPE-SN-IM (with 1M lithium salt): } \sigma = \frac{d}{R_b S} = \frac{0.032}{10.9 \times 1.8} = 1.63 \times 10^{-3} \text{ S} \cdot \text{cm}^{-1}.$$

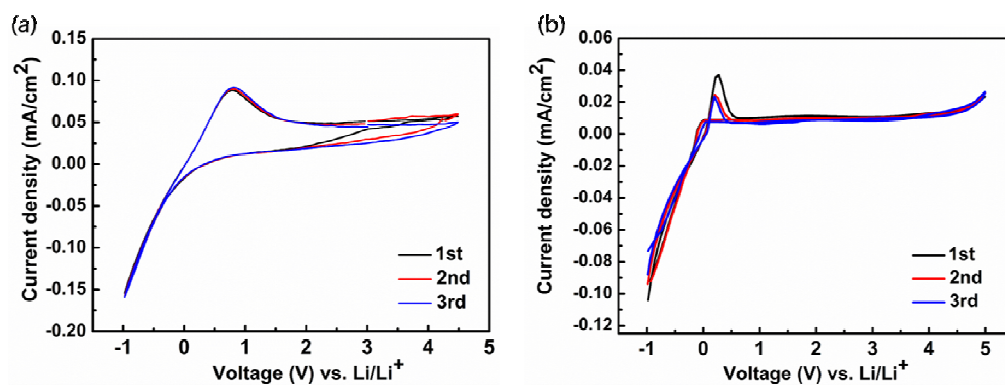

Figure S2. Cyclic voltammetry profiles of GPE-LE (a) and GPE-SN-IM (b) at a scanning rate of  $1 \text{ mV} \cdot \text{s}^{-1}$  at room temperature, using a Li/ electrolytes/stainless steel cell at  $25^\circ\text{C}$ .
